# Supplementary material
Source: Springer Nature journal article supplement (https://www.springermedizin.de/resource/supplementary/12967_2012_1554_MOESM5_ESM.pdf/9574216)

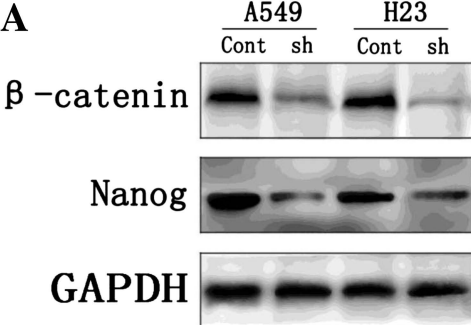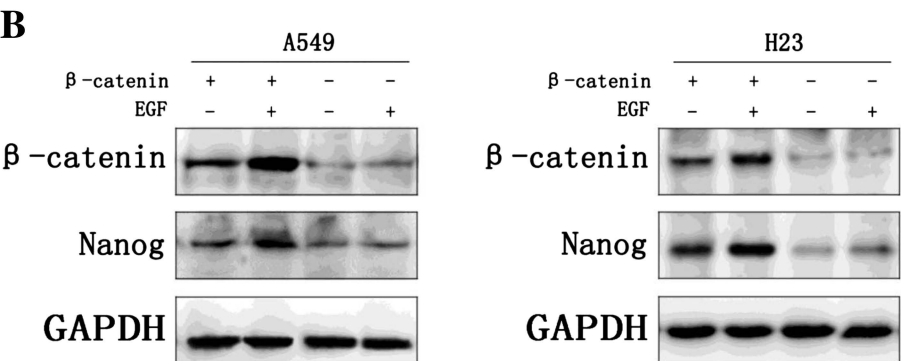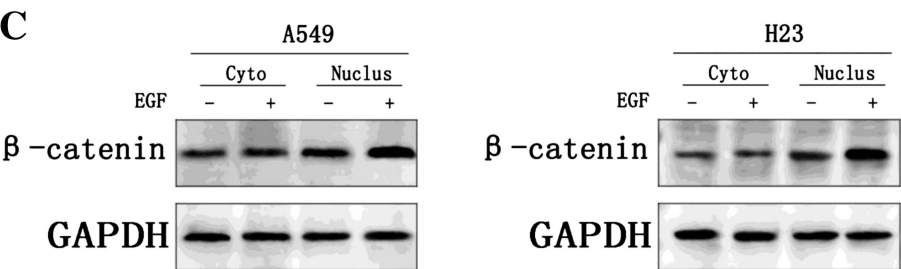

Supplement: MOESM5 [file 9574216]
